# 1 Identification of a Pangolin Niche for a 2019-nCoV-like Coronavirus via an 2 Extensive Meta-metagenomic Search

3  
4 **Lamia Wahba<sup>1\*</sup>, Nimit Jain<sup>1,3\*</sup>, Andrew Z. Fire<sup>1,2\*</sup>, Massa J. Shoura<sup>1\*</sup>, Karen L.  
5 Artiles<sup>1\*</sup>, Matthew J. McCoy<sup>1\*</sup>, Dae-Eun Jeong<sup>1\*</sup>**

6  
7 <sup>1</sup>Department of Pathology, Stanford University School of Medicine, Stanford, CA 94305, USA

8 <sup>2</sup>Department of Genetics, Stanford University School of Medicine, Stanford, CA 94305, USA

9 <sup>3</sup>Department of Bioengineering, Stanford University, Stanford, CA 94305, USA

10 \*Co-corresponding and equally contributing authors. Author order was chosen randomly.

11  
12 *Author for publication correspondence: Andrew Fire (afire@stanford.edu)*

## 13 14 **Abstract:**

15 In numerous instances, tracking the biological significance of a nucleic acid sequence  
16 can be augmented through the identification of environmental niches in which the sequence  
17 of interest is present. Many metagenomic datasets are now available, with deep sequencing of  
18 samples from diverse biological niches. While any individual metagenomic dataset can be  
19 readily queried using web-based tools, meta-searches through all such datasets are less  
20 accessible. In this brief communication, we demonstrate such a meta-meta-genomic  
21 approach, examining close matches to the Wuhan coronavirus 2019-nCoV in all high-  
22 throughput sequencing datasets in the NCBI Sequence Read Archive accessible with the  
23 keyword “virome”. In addition to the homology to bat coronaviruses observed in descriptions  
24 of the 2019-nCoV sequence (F. Wu et al. 2020, Nature, doi.org/10.1038/s41586-020-2008-3;  
25 P. Zhou et al. 2020, Nature, doi.org/10.1038/s41586-020-2012-7), we note a strong  
26 homology to numerous sequence reads in a metavirome dataset generated from the lungs of  
27 deceased Pangolins reported by Liu et al. (Viruses 11:11, 2019,  
28 <http://doi.org/10.3390/v11110979>). Our observations are relevant to discussions of the  
29 derivation of 2019-nCoV and illustrate the utility and limitations of meta-metagenomic  
30 search tools in effective and rapid characterization of potentially significant nucleic acid  
31 sequences.

### 33 **Importance:**

34           Meta-metagenomic searches allow for high-speed, low-cost identification of potentially  
35 significant biological niches for sequences of interest.

### 36 **Introduction:**

37           In the early years of nucleic acids sequencing, aggregation of the majority of published  
38 DNA and RNA sequences into public sequence databases greatly aided biological hypothesis  
39 generation and discovery. Search tools capable of interrogating the ever-expanding databases  
40 were facilitated by creative algorithm development and software engineering, and by the ever-  
41 increasing capabilities of computer hardware and the internet. As of the early 2000s,  
42 sequencing methodologies and computational technologies advanced in tandem, enabling  
43 quick homology results from a novel sequence without substantial cost.

44           With the development of larger-scale sequencing methodologies, the time and  
45 resources to search all extant sequence data became untenable for most studies. However,  
46 creative approaches involving curated databases and feature searches ensured that many key  
47 features of novel sequences remained readily accessible. At the same time, the nascent field  
48 of metagenomics began, with numerous studies highlighting the power of survey sequencing  
49 of DNA and RNA from samples as diverse as the human gut and Antarctic soil (1, 2). As the  
50 diversity and sizes of such datasets expand, the utility of searching them with a novel  
51 sequence increases. Meta-metagenomic searches are currently underutilized. In principle  
52 such searches would involve direct access to sequence data from a large set of metagenomic  
53 experiments on a terabyte scale, along with software able to search for similarity to a query  
54 sequence. We find that neither of these aspects of meta-metagenomic searches is infeasible  
55 with current data transfer and processing speeds. In this communication, we report the  
56 results of searching the recently-described 2019-nCoV coronavirus sequence through a set of  
57 metagenomic datasets with the tag "virome".

### 58 **Materials and Methods:**

59           Computing Hardware: A Linux workstation used for the bulk analysis of metagenomic  
60 datasets employs an 8-core i7 Intel Microprocessor, 128G of Random Access Memory, 12TB  
61 of conventional disk storage, and 1TB of SSD storage. Additional analyses of individual  
62 alignments were carried out with standard consumer-grade computers.

63           Sequence data: All sequence data for this analysis were downloaded from the National  
64 Center for Biotechnology Information (NCBI) website, with individual sequences downloaded  
65 through a web interface and metagenomic datasets downloaded from the NCBI Sequence  
66 Read Archive (SRA) using the SRA-tools package (version 2.9.1). The latter sequence data  
67 were downloaded as .sra files using the prefetch tool, with extraction to readable format  
68 (.fasta.gz) using the NCBI fastq-dump tool. Each of these manipulations can fail some  
69 fraction of the time. Obtaining the sequences can fail due to network issues, while extraction  
70 in readable format occasionally fails for unknown reasons. Thus the workflow continually  
71 requests .sra files with ncbi-prefetch until at least some type of file is obtained, followed by  
72 attempts to unpack into .fasta.gz format until one such file is obtained from each .sra file.  
73 Metagenomic datasets for analysis were chosen through a keyword search of the SRA  
74 descriptions for "virome" and downloaded between January 27 and January 31, 2020. We  
75 note that the "virome" keyword search will certainly not capture every metagenomic dataset

76 with viral sequences, and likewise not capture every virus in the short sequence read archive.  
77 With up to 16 threads running simultaneously, total download time (prefetch) was  
78 approximately 2 days. Similar time was required for conversion to gzipped fasta files. A total  
79 of 9014 sequence datasets were downloaded and converted to fasta.gz files. Most files  
80 contained large numbers of reads with a small fraction of files containing very little data (only  
81 a few reads or reads of at most a few base pairs). The total dataset consists of 2.5TB of  
82 compressed sequence data corresponding to approximately  $10^{13}$  bases.

83 Search Software: For rapid identification of close matches among large numbers of  
84 metagenomic reads, we used a simple dictionary based on the 2019-nCoV sequence (NCBI  
85 MN908947.3Wuhan-Hu-1) and its reverse complement, querying every 8th k-mer along the  
86 individual reads for matches to the sequence. As a reference, and to benchmark the workflow  
87 further, we included several additional sequences in the query (Vaccinia virus, an arbitrary  
88 segment of a flu isolate, the full sequence of bacteriophage P4, and a number of putative  
89 polinton sequences from *Caenorhabditis briggsae*). The relatively small group of k-mers  
90 being queried ( $<10^6$ ) allows a rapid search for homologs. This was implemented in a Python  
91 script run using the PyPy accelerated interpreter. We stress that this is by no means the most  
92 comprehensive or fastest search for large datasets. However, it is more than sufficient to  
93 rapidly find any closely matching sequence (with the downloading and conversion of the data,  
94 rather than the search, being rate limiting).

95 Alignment of reads to 2019-nCoV: Reads from the positive pangolin datasets were  
96 adapter-trimmed with cutadapt (version 1.18) (3), and mapped to the 2019-nCoV genome  
97 with BWA-MEM (version 0.7.12) (4) using default settings for paired-end mode. Alignments  
98 were visualized with the Integrated Genomics Viewer IGV tool (version 2.4.10) (5).

99 Assessment of nucleotide similarity between 2019-nCoV, pangolin metavirome reads,  
100 and closely related bat coronaviruses: All pangolin metavirome reads that aligned to the  
101 2019-nCoV genome with BWA-MEM after adapter trimming with cutadapt were used for  
102 calculation. The bat coronavirus genomes were aligned to the 2019-nCoV genome in a  
103 multiple sequence alignment using the web-interface for Clustal Omega  
104 (<https://www.ebi.ac.uk/Tools/msa/clustalo/>) (6) with default settings. We note that  
105 sequence insertions with respect to the 2019-nCoV genome in either the pangolin metavirome  
106 reads or the bat coronavirus genomes are not accounted for in the similarity traces shown in  
107 Figure 1b.

108 Regional assessment of synonymous and nonsynonymous mutations (Figure S1):  
109 Although the incomplete nature of coverage in the Pangolin metavirome data somewhat  
110 limits the application of measures such as normalized dN/dS values, it remains possible to  
111 identify regions with the strongest matches of this inferred viral sequence with the human  
112 and bat homologs and to determine the distribution of synonymous and nonsynonymous  
113 variants in these regions. Details of this analysis are presented in Figure S1.

114 Accessibility of Software: Scripts used for the observations described in this  
115 communication are available at <https://github.com/firelabsoftware/Metasearch2020>.

116

## 117 **Results:**

118 To identify biological niches that might harbor viruses closely related to 2019-nCoV,  
119 we searched through publicly available metaviromic datasets. We were most interested in  
120 viruses with highly similar sequences, as these would likely be most useful in forming  
121 hypotheses about the origin and pathology of the recent human virus. We thus set a  
122 threshold requiring matching of a perfect 32-nucleotide segment with a granularity of 8  
123 nucleotides in the search (i.e., interrogating the complete database of k-mers from the virus  
124 with k-mers starting at nucleotide 1, 9, 17, 25, 33 of each read from the metagenomic data for  
125 a perfect match). This would catch any perfect match of 39 nucleotides or greater, with some  
126 homologies as short as 32 nucleotides captured depending on the precise phasing of the read.

127 All metagenomic datasets with the keyword "virome" in NCBI SRA as of January 2020  
128 were selected for analysis in a process that required approximately 2 days each for  
129 downloading and conversion to readable file formats and one day for searching by k-mer  
130 match on a desktop workstation computer (i7 8-core). Together the datasets included  
131 information from 9014 NCBI Short Read Archive entries with (in total)  $6.2 \times 10^{10}$  individual  
132 reads and  $8.4 \times 10^{12}$  base pairs. Despite the relatively large mass of data, the 32-nucleotide k-  
133 mer match remains a stringent measure, with spurious matches to the ~30 kb 2019-nCoV  
134 genome expected at only 1 in  $3 \times 10^{14}$ . Positive matches among the metagenomic datasets  
135 analyzed were relatively rare, with the vast majority of datasets (8994/9014 or 99.8%)  
136 showing no matched 32-mers to 2019-nCoV. Of the datasets with matched k-mers, one was  
137 from an apparent synthetic mixture of viral sequences, while the remaining were all from  
138 vertebrate animal sources. The matches were from five studies: two bat-focused studies (7,  
139 8), one bird-focused study (9), one small-animal-and-rodent focused study (10), and a study  
140 of pangolins (11) [Table 1].

141 The abundance and homology of viruses within a metagenomic sample are of  
142 considerable interest in interpreting possible characteristics of infection and relevance to the  
143 query virus. From the quick k-mer search, an initial indicator could be inferred from the  
144 number of matching reads and k-mer match counts for those reads [Table 1, Supplementary  
145 Table 1]. For the 2019-nCoV matches amongst the available metagenomic datasets, the  
146 strongest and most abundant matches in these analyses came from the pangolin lung  
147 metaviromes. The matches were observed throughout the 2019-nCoV query sequence and  
148 many of the matching reads showed numerous matching 32-mer sequences. The vast  
149 majority of matches were in two lung samples with small numbers of matches in two  
150 additional lung datasets (11). No matches were detected for five additional lung datasets, and  
151 no matches were seen in eight spleen samples and a lymph node sample (11). Further  
152 analysis of coverage and homology through alignment of the entire metagenomic datasets  
153 revealed an extensive, if incomplete, coverage of the 2019-nCoV genome [Figure 1a]. Percent  
154 nucleotide similarity can be calculated for pangolin metavirome reads aligning to 2019-nCoV  
155 [Figure 1b], and these segmental homologies consistently showed strong matches,  
156 approaching (but still overall weaker than) the similarity of the closest known bat coronavirus  
157 (RaTG13).

158

## 159 **Discussion:**

160           Meta-meta-genomic searching can provide unique opportunities to understand the  
161 distribution of nucleic acid sequences in diverse environmental niches. As metagenomic  
162 datasets proliferate and as both the need and capability to identify pathogenic agents through  
163 sequencing increase, meta-metagenomic searching may prove extremely useful in tracing the  
164 origins and spreading of causative agents. In the example we present in this paper, such a  
165 search identifies a number of niches with sequences matching the genome of the recent 2019-  
166 nCoV virus. These analyses raise a number of relevant points for the origin of 2019-nCoV.  
167 Before describing the details of these points, however, it is important to stress that while  
168 environmental, clinical, and animal-based sequencing is valuable in understanding how  
169 viruses traverse the animal ecosphere, static sequence distributions cannot be used to  
170 construct a virus' full transmission history amongst different biological niches. So even were  
171 the closest relative of a virus causing disease in species X to be found in species Y, we cannot  
172 define the source of the outbreak, or the direction(s) of transmission. As some viruses may  
173 move more than once between hosts, the sequence of a genome at any time may reflect a  
174 history of selection and drift in several different host species. This point is also accentuated  
175 in the microcosm of our searches for this work. When we originally obtained the 2019-nCoV  
176 sequence from the posted work of Wu et al., we recapitulated their result that bat-SL-  
177 CoVZC45 was the closest related sequence in NCBI's non-redundant (nr/nt) database. In our  
178 screen of metavirome datasets, we observed several pangolin metavirome sequences—which  
179 are not currently in the (nr/nt) database—and which are more closely related to 2019-nCoV  
180 than bat-SL-CoVZC45. An assumption that the closest relative of a sequence identifies the  
181 origin would at that point have transferred the extant model to zoonosis from pangolin  
182 instead of bat. To complicate such a model, an additional study from Zhou et al. (12)  
183 described a previously unpublished Coronavirus sequence, designated RaTG13 with much  
184 stronger homology to 2019-nCoV than either bat-SL-CoVZC45 or the pangolin reads from Liu  
185 et al (11). While this observation certainly shifts the discussion (legitimately) toward a  
186 possible bat-borne intermediate in the chain leading to 2019-nCoV, it remains difficult to  
187 determine if any of these are true intermediates in the chain of infectivity.

188           The match of 2019-nCoV to the pangolin coronavirus sequences also enables a link to  
189 substantial context on the pangolin samples from Liu et al. (11), with information on the  
190 source of the rescued animals (from smuggling activity), the nature of their deaths despite  
191 rescue efforts, the potential presence of both other coronaviruses and other non-corona  
192 viruses in the same cells, and the accompanying pathology. That work describes analyses  
193 indicating several coronaviruses present in two of the pangolin lungs as well as other viral  
194 species in those lungs. The pangolins appear to have died from lung-related illness, which  
195 may have involved the 2019-nCoV closely-related virus. Notably, however, two of the  
196 deceased pangolin lungs had much lower coronavirus signals, while five showed no signal,  
197 with sequencing depths in the various lungs roughly comparable. Although it remains  
198 possible that the 2019-nCoV-like coronavirus was the primary cause of death for these  
199 animals, it is also possible (as noted by Liu et al. (11)) that the virus was simply present in the  
200 tissue, with mortality due to another virus, a combination of infectious agents, or other  
201 exposures.

202           During the course of this work, the homology between 2019-nCoV and pangolin  
203 coronavirus sequences in a particular genomic subregion was also noted and discussed in an  
204 online forum ("Virological.org") with some extremely valuable analyses and insights.

205 Matthew Wong and colleagues bring up the homology to the pangolin metagenomic dataset in  
206 this thread and appear to have encountered it through a more targeted search than ours (this  
207 study has since been posted online in bioRxiv) (13). As noted by Wong et al. (13), the Spike  
208 region includes a segment of ~200 bases where the inferred divergence between RaTG13 and  
209 2019-nCoV dramatically increases. This region is of interest as the spike protein is a  
210 determinant of viral host range and under heavy selection (14). The observed Spike region  
211 divergence indeed includes a substantial set of nonsynonymous differences (Supplemental  
212 Figure 1). Notably, while reads from the pangolin lung dataset mapped to this region do not  
213 show a similar increase in variation relative to the human 2019-nCoV, we also did not observe  
214 a significant drop in variance between human and pangolin in this region. While Wong et al.  
215 concluded that recombination likely occurred in the spike region in the derivation of 2019-  
216 nCoV, definitive conclusions regarding the origins of 2019-nCoV are difficult given the limited  
217 sequencing data available and without consideration to altered evolutionary rates in different  
218 lineages (15). Thus alternative models for the observed sequence variation seem most  
219 parsimonious, including that of selection acting on the RaTG13 sequences in bat or another  
220 intermediate host resulting in a rapid variation of this highly critical virus-receptor interface.

221 The availability of numerous paths (both targeted and agnostic) toward identification  
222 of natural niches for pathogenic sequences will remain useful to the scientific community and  
223 to public health, as will vigorous sharing of ideas, data, and discussion of potential origins  
224 and modes of spread for epidemic pathogens.

225

## 226 **Acknowledgments:**

227 **Competing interests:** The authors declare that they have no competing interests;

228 **Funding:** This study was supported by the following programs, grants and fellowships:  
229 Human Frontier Science Program (HFSP) to DEJ, Arnold O. Beckman Award to MJS,  
230 Stanford Genomics Training Program (5T32HG000044-22; PI: M. Snyder) to MJM, and  
231 R35GM130366 to AZF. **Authors' contributions:** All authors contributed equally, and  
232 author order was selected randomly.

## 233 **References:**

- 234 1. Bry L, Falk PG, Midtvedt T, Gordon JI. 1996. A model of host-microbial interactions in  
235 an open mammalian ecosystem. *Science* 273:1380-3.
- 236 2. Bowman JS. 2018. Identification of Microbial Dark Matter in Antarctic Environments.  
237 *Front Microbiol* 9:3165.
- 238 3. Marcel M. 2011. Cutadapt removes adapter sequences from high-throughput  
239 sequencing reads. *EMBnetjournal* 17:10-12.
- 240 4. Li H, Durbin R. 2010. Fast and accurate long-read alignment with Burrows-Wheeler  
241 transform. *Bioinformatics* 26:589-95.
- 242 5. Thorvaldsdottir H, Robinson JT, Mesirov JP. 2013. Integrative Genomics Viewer  
243 (IGV): high-performance genomics data visualization and exploration. *Brief Bioinform*  
244 14:178-92.

- 245 6. Madeira F, Park YM, Lee J, Buso N, Gur T, Madhusoodanan N, Basutkar P, Tivey ARN,  
246 Potter SC, Finn RD, Lopez R. 2019. The EMBL-EBI search and sequence analysis tools  
247 APIs in 2019. *Nucleic Acids Res* 47:W636-W641.
- 248 7. Hu D, Zhu C, Wang Y, Ai L, Yang L, Ye F, Ding C, Chen J, He B, Zhu J, Qian H, Xu W,  
249 Feng Y, Tan W, Wang C. 2017. Virome analysis for identification of novel mammalian  
250 viruses in bats from Southeast China. *Sci Rep* 7:10917.
- 251 8. Yinda CK, Zeller M, Conceicao-Neto N, Maes P, Deboutte W, Beller L, Heylen E,  
252 Ghogomu SM, Van Ranst M, Matthijnsens J. 2016. Novel highly divergent reassortant  
253 bat rotaviruses in Cameroon, without evidence of zoonosis. *Sci Rep* 6:34209.
- 254 9. Wille M, Eden JS, Shi M, Klaassen M, Hurt AC, Holmes EC. 2018. Virus-virus  
255 interactions and host ecology are associated with RNA virome structure in wild birds.  
256 *Mol Ecol* 27:5263-5278.
- 257 10. Wu Z, Lu L, Du J, Yang L, Ren X, Liu B, Jiang J, Yang J, Dong J, Sun L, Zhu Y, Li Y,  
258 Zheng D, Zhang C, Su H, Zheng Y, Zhou H, Zhu G, Li H, Chmura A, Yang F, Daszak P,  
259 Wang J, Liu Q, Jin Q. 2018. Comparative analysis of rodent and small mammal  
260 viromes to better understand the wildlife origin of emerging infectious diseases.  
261 *Microbiome* 6:178.
- 262 11. Liu P, Chen W, Chen JP. 2019. Viral Metagenomics Revealed Sendai Virus and  
263 Coronavirus Infection of Malayan Pangolins (*Manis javanica*). *Viruses* 11:11.
- 264 12. Zhou P, Yang XL, Wang XG, Hu B, Zhang L, Zhang W, Si HR, Zhu Y, Li B, Huang CL,  
265 Chen HD, Chen J, Luo Y, Guo H, Jiang RD, Liu MQ, Chen Y, Shen XR, Wang X, Zheng  
266 XS, Zhao K, Chen QJ, Deng F, Liu LL, Yan B, Zhan FX, Wang YY, Xiao GF, Shi ZL.  
267 2020. A pneumonia outbreak associated with a new coronavirus of probable bat origin.  
268 *Nature* doi:10.1038/s41586-020-2012-7.
- 269 13. Wong MC, Javornik Cregeen SJ, Ajami NJ, Petrosino JF. 2020. Evidence of  
270 recombination in coronaviruses implicating pangolin origins of nCoV-2019. *bioRxiv*  
271 doi:10.1101/2020.02.07.939207:2020.02.07.939207.
- 272 14. Li F. 2016. Structure, Function, and Evolution of Coronavirus Spike Proteins. *Annu*  
273 *Rev Virol* 3:237-261.
- 274 15. Paraskevis D, Kostaki EG, Magiorkinis G, Panayiotakopoulos G, Sourvinos G, S. T.  
275 2020. Full-genome evolutionary analysis of the novel corona virus (2019-nCoV) rejects  
276 the hypothesis of emergence as a result of a recent recombination event. *Infection,*  
277 *Genetics and Evolution* 79:104212.

278

| Description                   | File          | TotalReads | TotalBases | HitReads | HitKmers |
|-------------------------------|---------------|------------|------------|----------|----------|
| Pangolin Lung                 | SRR10168376_1 | 18067615   | 2710142250 | 5        | 9        |
| Pangolin Lung                 | SRR10168376_2 | 18067615   | 2710142250 | 6        | 21       |
| Pangolin Lung                 | SRR10168377_1 | 16414925   | 2462238750 | 308      | 955      |
| Pangolin Lung                 | SRR10168377_2 | 16414925   | 2462238750 | 285      | 904      |
| Pangolin Lung                 | SRR10168378_1 | 19045923   | 2856888450 | 91       | 352      |
| Pangolin Lung                 | SRR10168378_2 | 19045923   | 2856888450 | 96       | 337      |
| Pangolin Lung                 | SRR10168392_1 | 39738679   | 5960801850 | 2        | 4        |
| Pangolin Lung                 | SRR10168392_2 | 39738679   | 5960801850 | 4        | 6        |
| "Mock virome"                 | SRR3458564_2  | 10957589   | 1654595939 | 1        | 1        |
| Bat Feces                     | SRR5040897_1  | 4020145    | 607041895  | 5        | 5        |
| Bat Feces                     | SRR5040897_2  | 4020145    | 607041895  | 4        | 4        |
| Bat Feces                     | SRR5040918_1  | 4804340    | 725455340  | 4        | 4        |
| Bat Feces                     | SRR5040918_2  | 4804340    | 725455340  | 3        | 3        |
| Virome analysis of Rodents at | SRR5343975_1  | 19775296   | 1582023680 | 1        | 1        |
| Virome analysis of Rodents at | SRR5343977_1  | 20227246   | 1618179680 | 1        | 2        |
| Bat                           | SRR5351751_2  | 363186     | 32644600   | 1        | 1        |
| Bat                           | SRR5351752_1  | 305206     | 27328640   | 24       | 57       |
| Bat                           | SRR5351752_2  | 305206     | 27608440   | 20       | 55       |
| Bat                           | SRR5351758_2  | 301889     | 27514580   | 1        | 3        |
| Bat                           | SRR5351760_1  | 788212     | 70634120   | 407      | 962      |
| Bat                           | SRR5351760_2  | 788212     | 71244040   | 378      | 1006     |
| Virome analysis of Rodents at | SRR5365807_1  | 21646498   | 1731719840 | 2        | 5        |
| Virome analysis of Rodents at | SRR5365809_1  | 22799703   | 1823976240 | 1        | 1        |
| Virome analysis of Rodents at | SRR5431767_1  | 10213803   | 1031594103 | 2        | 2        |
| Virome analysis of Rodents at | SRR5447167_1  | 13849913   | 1398841213 | 2        | 2        |
| Virome analysis of Rodents at | SRR5447174_1  | 14063346   | 1420397946 | 1        | 1        |
| Virome analysis of Rodents at | SRR5447175_1  | 7510256    | 758535856  | 1        | 1        |
| Avocet (RNA Virome in Wild f  | SRR7239364_1  | 22336985   | 2233698500 | 2        | 2        |

Metagenomic datasets with k=32-mer matches to MN908947.3 2019-nCoV  
 Details of search and are described in legend to Table S1

279

280

281

**Table 1. Metagenomic datasets with k=32-mer matches to MN908947.3 (2019-nCoV).**  
 Details of search are described in legend to Table S1.



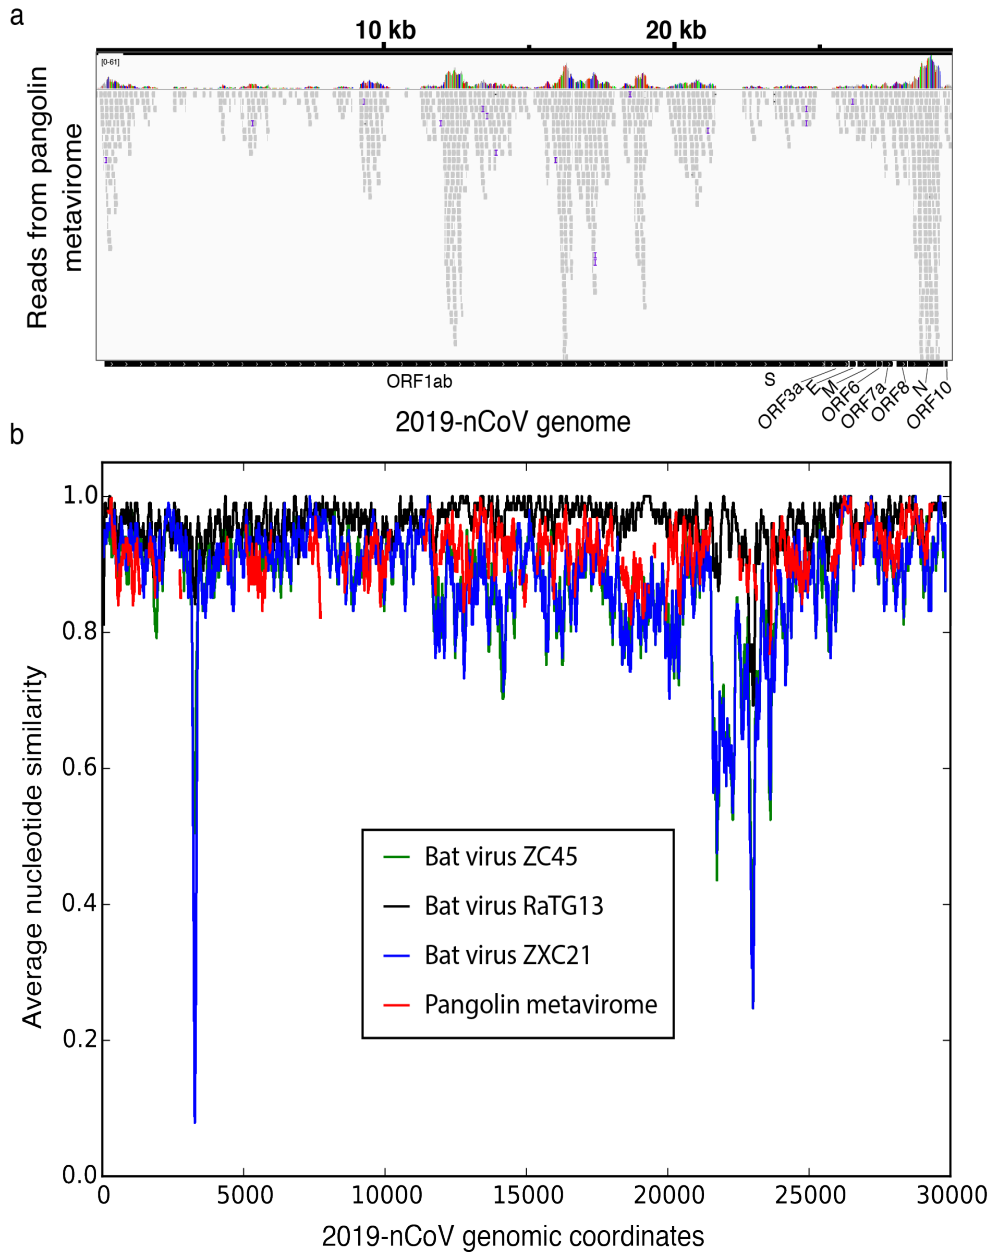

282

283 **Figure 1. (a) Integrated Genomics Viewer (IGV) snapshot of alignment.** Reads from the  
284 pangolin lung virome samples (SRR10168377, SRR10168378 and SRR10168376) were mapped to a  
285 2019-nCoV reference sequence (Genbank accession: MN908947.3). The total number of aligned reads  
286 from the three samples was 1107, 313 and 32 reads respectively. **(b) Quantification of nucleotide-**  
287 **level similarity between the 2019-nCoV genome and pangolin lung metavirome reads**  
288 **aligning to the 2019-nCoV genome.** Average similarity was calculated in 101-nucleotide windows  
289 along the 2019-nCoV genome, and is only shown for those windows where each nucleotide in the  
290 window had coverage  $\geq 2$ . Average nucleotide similarity calculated (in 101-nucleotide windows)  
291 between the 2019-nCoV genome and reference genomes of three relevant bat coronaviruses (bat-SL-  
292 CoVZC45: accession MG772933.1, bat-SL-CoVZXC21: accession MG772934.1, RaTG13: accession  
293 MN996532.1) is also shown. Note that the Pangolin metavirome similarity trace is not directly  
294 comparable to the bat coronavirus similarity traces, because the former uses read data for calculation  
295 whereas the latter use reference genomes.

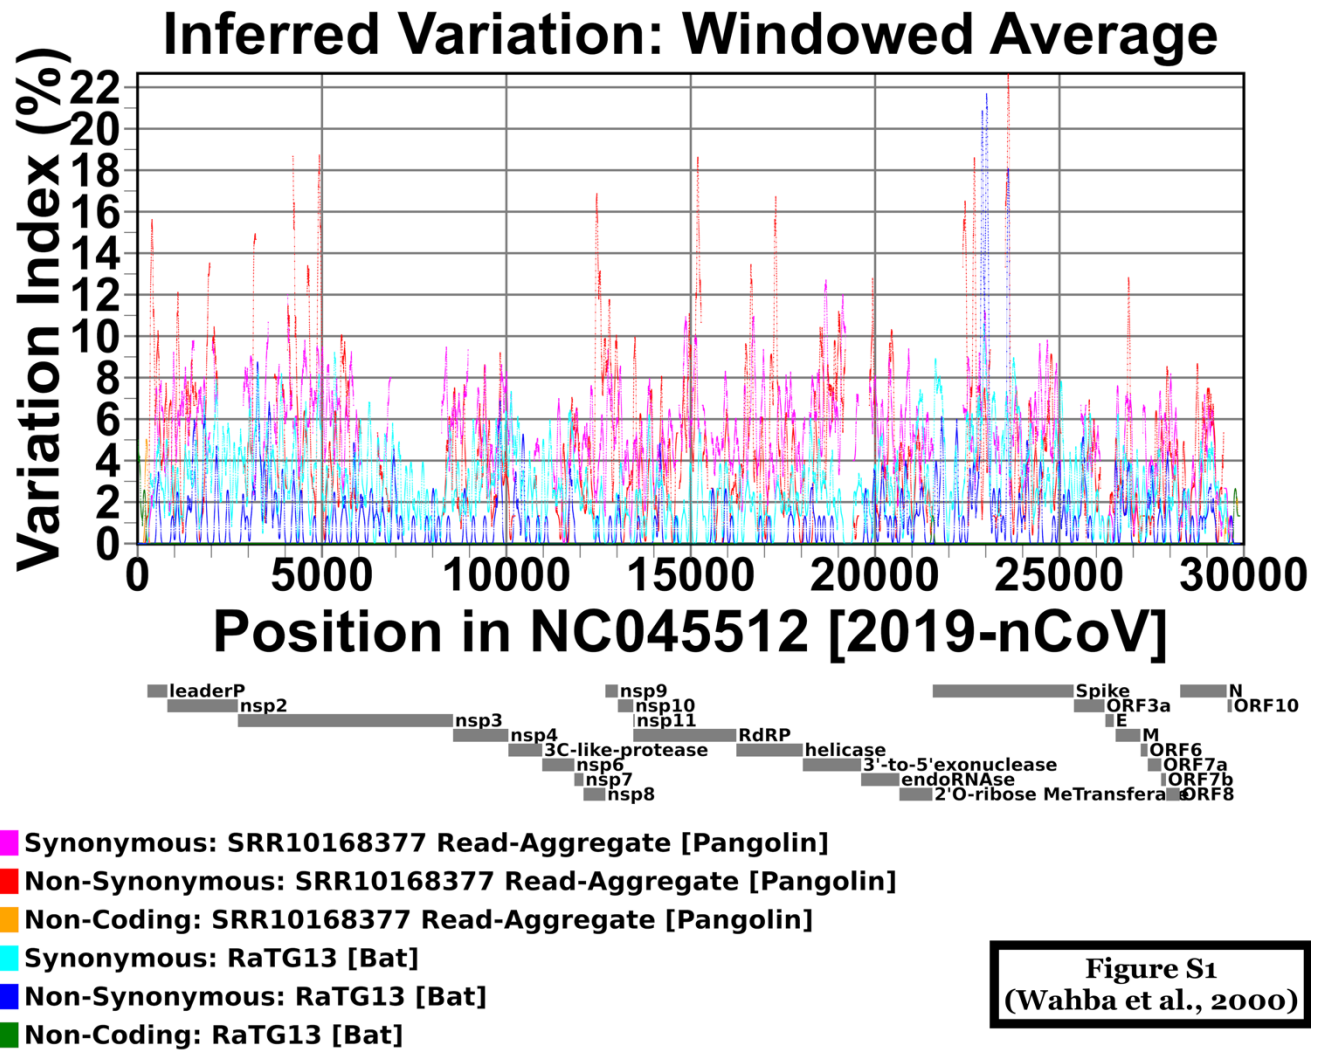

296

297

298 **Supplemental Figure 1: Detailed plot of inferred substitutions.** The plot shows incidence of  
299 inferred synonymous, nonsynonymous, and noncoding substitution from comparison of RaTG13  
300 assembly [2] and a pangolin coronavirus scaffold, to the 2019-nCoV isolate from Wu et al. [1]. The  
301 pangolin scaffold was generated from a Blast alignment of 2019-nCoV mapping reads in  
302 SRR10168377. This plot addresses several challenges associated with the limited sequencing data  
303 available by attempting to provide the most favorable alignment of that sequence possible. To  
304 maximize sensitivity in detecting potential recombination, ambiguities in which two or more reads  
305 apparently disagreed (which were rare; approximately 1.2% of assigned bases) were resolved in favor  
306 of "no substitution" at any position if one read matches the 2019-nCoV genome. This will provide a  
307 lower bound of variation, although regions covered by a single read are still subject to amplification  
308 and sequencing error. Near-perfect overlaps between reads from SRR10168377 argue that such error  
309 is relatively low as agreement in those regions is 99.6%. The cumulative count of synonymous,  
310 nonsynonymous, and noncoding variants are per base pair and are taken over a 75 bp window  
311 (approximately 1/2 the read length) and then averaged over each 75 bp window with a weighting  
312 inversely proportional to distance. This results in the observed inverted spike for each individual  
313 variant.

**TableS1 (Wahba et al. 2020)**

(Graphic below shows an abbreviated segment of Table S1, Full Table at [GitHub.com/FireLabSoftware/MetaSearch](https://github.com/FireLabSoftware/MetaSearch))

| File                                                                                          | TotalReads                                                                                                                           | TotalBases | HitReads | HitKmers | MatchList                                                          |
|-----------------------------------------------------------------------------------------------|--------------------------------------------------------------------------------------------------------------------------------------|------------|----------|----------|--------------------------------------------------------------------|
| DRR023333_1                                                                                   | 6243181                                                                                                                              | 1667084289 | 1        | 17       | X51522.1_phageP4;p8531a_m17                                        |
| DRR027642_1                                                                                   | 133932                                                                                                                               | 74769093   | 0        | 0        |                                                                    |
| DRR027643_1                                                                                   | 175545                                                                                                                               | 89568995   | 0        | 0        |                                                                    |
| DRR053207_1                                                                                   | 389643                                                                                                                               | 46137596   | 0        | 0        |                                                                    |
| DRR053207_2                                                                                   | 389643                                                                                                                               | 46084317   | 0        | 0        |                                                                    |
| DRR053208_1                                                                                   | 596864                                                                                                                               | 124512374  | 0        | 0        |                                                                    |
| DRR053208_2                                                                                   | 596864                                                                                                                               | 126069168  | 0        | 0        |                                                                    |
| DRR053209_1                                                                                   | 1476975                                                                                                                              | 165712432  | 0        | 0        |                                                                    |
| -----                                                                                         |                                                                                                                                      |            |          |          |                                                                    |
| <17374 Rows Not Displayed>                                                                    |                                                                                                                                      |            |          |          |                                                                    |
| -----                                                                                         |                                                                                                                                      |            |          |          |                                                                    |
| SRR9843092_1                                                                                  | 12545909                                                                                                                             | 1267136809 | 0        | 0        |                                                                    |
| SRR9843092_2                                                                                  | 12545909                                                                                                                             | 1267136809 | 0        | 0        |                                                                    |
| SRR9843093_1                                                                                  | 11515623                                                                                                                             | 1163077923 | 0        | 0        |                                                                    |
| SRR9843093_2                                                                                  | 11515623                                                                                                                             | 1163077923 | 0        | 0        |                                                                    |
| SRR9843094_1                                                                                  | 11313284                                                                                                                             | 1142641684 | 4        | 11       | X51522.1_phageP4;p7952s_m2 p8127a_m5 p8873a_m2(2)                  |
| SRR9843094_2                                                                                  | 11313284                                                                                                                             | 1142641684 | 6        | 35       | X51522.1_phageP4;p7952s_m2 p8204a_m9 p8241a_m9 p8282a_m1 p8472s_m9 |
| SRR9892957_1                                                                                  | 10302064                                                                                                                             | 1030206400 | 1        | 4        | X51522.1_phageP4;p5128a_m4                                         |
| SRR9892957_2                                                                                  | 10302064                                                                                                                             | 1030206400 | 1        | 6        | X51522.1_phageP4;p5012s_m6                                         |
| SRR9892958_1                                                                                  | 10170129                                                                                                                             | 1017012900 | 0        | 0        |                                                                    |
| SRR9892958_2                                                                                  | 10170129                                                                                                                             | 1017012900 | 0        | 0        |                                                                    |
| SRR9892959_1                                                                                  | 10042853                                                                                                                             | 1004285300 | 0        | 0        |                                                                    |
| SRR9892959_2                                                                                  | 10042853                                                                                                                             | 1004285300 | 0        | 0        |                                                                    |
| -----                                                                                         |                                                                                                                                      |            |          |          |                                                                    |
| <b>--Metagenome Set: All NCBI SRA sequences as of January 27-31 2020 with keyword virome.</b> |                                                                                                                                      |            |          |          |                                                                    |
| -----                                                                                         |                                                                                                                                      |            |          |          |                                                                    |
| <b>--Query Set:</b>                                                                           |                                                                                                                                      |            |          |          |                                                                    |
| >MN908947.3W                                                                                  | Initial Deposit of 2019-nCoV                                                                                                         |            |          |          |                                                                    |
| >cb1_chrUn:103                                                                                | Control 1: A polinton transposon from C. briggsae                                                                                    |            |          |          |                                                                    |
| >cb1_chrUn:164                                                                                | Control 2: A polinton transposon from C. briggsae                                                                                    |            |          |          |                                                                    |
| >cb1_chrUn:564                                                                                | Control 3: A polinton transposon from C. briggsae                                                                                    |            |          |          |                                                                    |
| >X51522.1_phage                                                                               | Control 4: A bacteriophage genome                                                                                                    |            |          |          |                                                                    |
| >AF250364.2_InfluenzaH1N1_neuraminidase                                                       | Control 5: An arbitrary segment from an H1N1 Flu isolate                                                                             |            |          |          |                                                                    |
| >AY603355.1_Vaccinia                                                                          | Control 6: An full vaccinia genome (note that inspection of the vaccinia hits seems to indicate that some or all hits are fr         |            |          |          |                                                                    |
| -----                                                                                         |                                                                                                                                      |            |          |          |                                                                    |
| <b>--Output Format</b>                                                                        |                                                                                                                                      |            |          |          |                                                                    |
| Column 1:                                                                                     | Dataset_ReadNumber (e.g. SRRXXX_2 is the read 2 file from SRXXX)                                                                     |            |          |          |                                                                    |
| Column 2:                                                                                     | Number of Reads extracted and analyzed                                                                                               |            |          |          |                                                                    |
| Column 3:                                                                                     | Number of bases analyzed                                                                                                             |            |          |          |                                                                    |
| Column 4:                                                                                     | Number of hits from the viral sampler query                                                                                          |            |          |          |                                                                    |
| Column 5:                                                                                     | Total number of hit k-mers                                                                                                           |            |          |          |                                                                    |
| Column 6:                                                                                     | Summary of hits. Each element has a query name (e.g. X51522.1_phageP4), a position (e.g. p5012 starts at position 5012); a strand (' |            |          |          |                                                                    |
| -----                                                                                         |                                                                                                                                      |            |          |          |                                                                    |
| <b>--Query Code: Jazz18Heap.py version AG</b>                                                 |                                                                                                                                      |            |          |          |                                                                    |
| Parameters of Jazz18Heap call were as follows                                                 |                                                                                                                                      |            |          |          |                                                                    |
| Include=<Virus_Sampler_File>                                                                  | (fasta file of the above seven sequences)                                                                                            |            |          |          |                                                                    |
| Data="*.fasta.gz                                                                              |                                                                                                                                      |            |          |          |                                                                    |

```

ReportGranularity=0 (provides somewhat limited output reporting)
MultiTask=16 (uses 16 threads-- this was used to provide multitasking on a system with 16 threads [8 cores=16threads])
Klen=32
SearchGranularity=8

## Jaz18Heap.py version AG
## This program is a fast metasearch that will look for instances of sequence reads matching
## a reference in at least one k-mer.
## Jaz18Heap is intended to look for evidence of matches to a relatively short reference sequence
## e.g., less than 100KB, but probably workable up to several MB in a large number of high throughput sequencing experiments
## Jaz18Heap is intended for finding relatively rare sequence (not common ones)
## Jaz18Heap doesn't substitute for many tools to align and track coverage. It's main goal is rapid identification of potentially homologous se
## Inputs are as follows (command line, Key=Value syntax)
## ReferenceFile = <FastA file with list of sequences to match k-mers from>
## ExcludeFile = <FastA file with sequences that will be excluded from matches>
## DataFiles = <List of .fastq files, .fasta files, or NCBA-SRA accessions [e.g, SRR####]>
## Lists are comma delimited with no spaces in list
## .fasta or .fastq files can be gzip compressed, although this somewhat slows the program down
## .fasta and .fasta.gz files must have exactly one sequence per line (no multiline sequences)
## For .fasta files to be downloaded from NCBI-SRA archive this entails the command line parameter --fasta 0
## * Wildcards are allowed here as well, or list of files in a file with the extension .files
## Providing a directory here will search all files in this directory or subdirectory for fasta and fastq data files
## Optional Parameters (will default to reasonable values if not set)
## OutFileBase = <Character String to Label Output Files with>
## ReportGranularity = <How many reads to process before reporting hit numbers (default is 1Million)>
## SearchGranularity = <How much distance between k-mers to be examined in each data read
## setting SearchGranularity=1 makes Jaz18Heap look at every k-mer in every read
## setting SearchGranularity=8 makes Jaz18Heap look at every 8th k-mer in every read
## higher numbers may miss a few hits but can greatly improve speed.
## setting to a large number (999999) ensures only one k-mer will be looked up per read
## SearchOffset = <Where to start jumping through each read for potential k-mers (zero means start at first base)
## fastqdump = <Where to look for the fasterq-dump binary [program will look for this but if it is not found, the full path to fasterq-dump bina
## klen = <How long are the k-mers used>. Default klen = 32
## snpAllow = <Set to True to allow a single mismatch in each k-mer (default is False)
## Circular = <Set to True to force every Reference sequence to be treated as a circle>
## Default : Uses the FastA name line-- if this line contains "Circular", the sequence is treated as a circle
## Multithreading: Jaz18Heap has the very primitive multitasking ability to spawn a number
## of derivative processes for a large number of data files to be scanned. To use 16 Threads
## Set MultiThreading=16 in the command line.
## Output:
## Output consists of a log file with information on the run and a FastA file.
## FastA files have information about each read in the ID line
## ID Structure:
## DataFileName;LineNumberInDataFile;ReferenceFileName;ReferenceSequenceName;NumberOfMatchedKmers
## Running the program:
## Jaz18Heap only runs at full speed with a variant of Python (PyPY) that included a just-in-time compiler
## Syntax Jaz18Heap RefFile=<MyRefFile> DataFiles=MyFastA1.fasta,MyFastA2.fasta.gz,MyFastQ*.fastq <Other_Parameters>

```
